# Supplementary material for: Distinct immune cell dynamics mark adverse events and antibody responses of SARS-CoV-2 mRNA vaccine
Source: Research Square preprint supplement (doi:10.21203/rs.3.rs-916246/v1), 2021-09-17
Supplement: Supplementary file 1 [file 1be7c1edf40389e117818aba.pdf]

**Supplemental Information S1. Criteria of symptom severity score**

| <b>Local Symptom</b> | <b>Grade 1</b>                | <b>Grade 2</b>                  | <b>Grade 3</b>          | <b>Grade 4</b>                     |
|----------------------|-------------------------------|---------------------------------|-------------------------|------------------------------------|
| Pain                 | No interference with activity | Some interference with activity | Prevents daily activity | ER visit or hospitalization        |
| Redness              | 2.5 – 5 cm                    | 5.1 – 10 cm                     | > 10 cm                 | Necrosis or exfoliative dermatitis |
| Swelling             | 2.5 – 5 cm                    | 5.1 – 10 cm                     | > 10 cm                 | Necrosis                           |

| <b>Systemic Symptom</b> | <b>Grade 1</b>                | <b>Grade 2</b>                  | <b>Grade 3</b>                    | <b>Grade 4</b>              |
|-------------------------|-------------------------------|---------------------------------|-----------------------------------|-----------------------------|
| Fever                   | 38.0 – 38.4 °C                | 38.5 – 38.9 °C                  | 39.0 – 40 °C                      | > 40 °C                     |
| Fatigue                 | No interference with activity | Some interference with activity | Prevents daily activity           | ER visit or hospitalization |
| Headache                | No interference with activity | Some interference with activity | Prevents daily activity           | ER visit or hospitalization |
| Chills                  | No interference with activity | Some interference with activity | Prevents daily activity           | ER visit or hospitalization |
| Vomiting                | 1 – 2 episodes / 24 hours     | > 2 episodes / 24 hours         | Requires intravenous hydration    | ER visit or hospitalization |
| Diarrhea                | 2 – 3 loose stools / 24 hours | 4 – 5 loose stools / 24 hours   | 6 or more loose stools / 24 hours | ER visit or hospitalization |
| Muscle pain             | No interference with activity | Some interference with activity | Prevents daily activity           | ER visit or hospitalization |
| Joint pain              | No interference with activity | Some interference with activity | Prevents daily activity           | ER visit or hospitalization |
